# Supplementary material for: Polygenic Scores and Preclinical Cardiovascular Disease in Individuals With HIV: Insights From the REPRIEVE Trial
Source: PubMed Central journal article supplement — J Am Heart Assoc. 2024 Mar 27;13(7):e033413. doi: 10.1161/JAHA.123.033413 (PMC11179771; doi:10.1161/jaha.123.033413), 2024-03-27
Supplement: JAH3-13-e033413-s001.pdf [file JAH3-13-e033413-s001.pdf]

# **SUPPLEMENTAL MATERIAL**

**Table S1. Baseline and HIV characteristics for AIDS Clinical Trials Group (ACTG) cohort.**

| <b>Demographic and Cardiovascular Characteristics of AIDS Clinical Trials Group (ACTG) cohort</b> |                        |                          |                              |                           |
|---------------------------------------------------------------------------------------------------|------------------------|--------------------------|------------------------------|---------------------------|
| <b>Characteristic</b>                                                                             |                        | <b>ACTG<br/>(N=4837)</b> | <b>Non-ACTG<br/>(N=2932)</b> | <b>Total<br/>(N=7769)</b> |
| <b>Demographics and Behavioral</b>                                                                |                        |                          |                              |                           |
| Age (years)                                                                                       | Median (Q1,Q3)         | 49 (45,54)               | 51 (46,55)                   | 50 (45,55)                |
|                                                                                                   | 40-49                  | 2,455 (51%)              | 1,275 (43%)                  | 3,730 (48%)               |
|                                                                                                   | 50-59                  | 1,992 (41%)              | 1,369 (47%)                  | 3,361 (43%)               |
|                                                                                                   | 60+                    | 390 (8%)                 | 288 (10%)                    | 678 (9%)                  |
| Natal sex                                                                                         | Male                   | 3,048 (63%)              | 2,302 (79%)                  | 5,350 (69%)               |
|                                                                                                   | Female                 | 1,789 (37%)              | 630 (21%)                    | 2,419 (31%)               |
| Gender identity                                                                                   | Cisgender              | 4,665 (96%)              | 2,702 (92%)                  | 7,367 (95%)               |
|                                                                                                   | Transgender Spectrum   | 78 (2%)                  | 49 (2%)                      | 127 (2%)                  |
|                                                                                                   | Not reported           | 94 (2%)                  | 181 (6%)                     | 275 (4%)                  |
| Race                                                                                              | Black/African American | 2,233 (46%)              | 975 (33%)                    | 3,208 (41%)               |
|                                                                                                   | White                  | 1,143 (24%)              | 1,561 (53%)                  | 2,704 (35%)               |
|                                                                                                   | Asian                  | 1,110 (23%)              | 28 (1%)                      | 1,138 (15%)               |
|                                                                                                   | Other                  | 351 (7%)                 | 368 (13%)                    | 719 (9%)                  |
| Ethnicity                                                                                         | N                      | 2,066                    | 1,852                        | 3,918                     |
|                                                                                                   | Hispanic or Latino     | 396 (19%)                | 302 (16%)                    | 698 (18%)                 |
|                                                                                                   | Not Hispanic or Latino | 1,652 (80%)              | 1,534 (83%)                  | 3,186 (81%)               |
|                                                                                                   | Unknown                | 18 (1%)                  | 16 (1%)                      | 34 (1%)                   |
| Smoking status                                                                                    | Current                | 1,055 (22%)              | 879 (30%)                    | 1,934 (25%)               |
|                                                                                                   | Former                 | 1,051 (22%)              | 853 (29%)                    | 1,904 (25%)               |
|                                                                                                   | Never                  | 2,725 (56%)              | 1,198 (41%)                  | 3,923 (51%)               |
| Substance use                                                                                     | Current                | 71 (1%)                  | 81 (3%)                      | 152 (2%)                  |
|                                                                                                   | Former                 | 1,103 (23%)              | 1,173 (40%)                  | 2,276 (29%)               |
|                                                                                                   | Never                  | 3,656 (76%)              | 1,677 (57%)                  | 5,333 (69%)               |
| <b>Cardiovascular and Metabolic</b>                                                               |                        |                          |                              |                           |
| Hypertension                                                                                      |                        | 1,636 (34%)              | 1,138 (39%)                  | 2,774 (36%)               |
| Pre-existing diabetes mellitus                                                                    |                        | 17 (<0.5%)               | 20 (1%)                      | 37 (<0.5%)                |
| BMI (kg/m <sup>2</sup> )                                                                          | Median (Q1,Q3)         | 25.3 (22.2,29.1)         | 26.3 (23.6,29.9)             | 25.8 (22.8,29.4)          |
|                                                                                                   | <18.5                  | 240 (5%)                 | 47 (2%)                      | 287 (4%)                  |
|                                                                                                   | 18.5-24.9              | 2,051 (42%)              | 1,067 (36%)                  | 3,118 (40%)               |
|                                                                                                   | 25-29.9                | 1,559 (32%)              | 1,104 (38%)                  | 2,663 (34%)               |
|                                                                                                   | 30+                    | 985 (20%)                | 710 (24%)                    | 1,695 (22%)               |
| Triglycerides (mg/dL)                                                                             | Median (Q1,Q3)         | 986 (20%)                | 124 (87,181)                 | 114 (81,169)              |
| LDL-C (mg/dL)                                                                                     | Median (Q1,Q3)         | 987 (20%)                | 111 (90,129)                 | 108 (87,128)              |
| HDL-C (mg/dL)                                                                                     | Median (Q1,Q3)         | 988 (20%)                | 46 (38,57)                   | 48 (39,59)                |
| <b>HIV Disease Characteristics and Other Co-morbid Conditions</b>                                 |                        |                          |                              |                           |
| <b>Characteristic</b>                                                                             |                        | <b>ACTG<br/>(N=4837)</b> | <b>Non-ACTG<br/>(N=2932)</b> | <b>Total<br/>(N=7769)</b> |
| <b>HIV-Related Health Status</b>                                                                  |                        |                          |                              |                           |
| Years since HIV diagnosis                                                                         | Median (Q1,Q3)         | 12 (8,18)                | 14 (7,21)                    | 13 (8,19)                 |
| Mode of HIV acquisition                                                                           | Heterosexual Contact   | 2,927 (61%)              | 1,028 (35%)                  | 3,955 (51%)               |
|                                                                                                   | Homosexual Contact     | 1,392 (29%)              | 1,362 (46%)                  | 2,754 (35%)               |
|                                                                                                   | Injection Drug Use     | 73 (2%)                  | 126 (4%)                     | 199 (3%)                  |
|                                                                                                   | Multiple Modes         | 130 (3%)                 | 154 (5%)                     | 284 (4%)                  |
|                                                                                                   | Other                  | 59 (1%)                  | 40 (1%)                      | 99 (1%)                   |
|                                                                                                   | Unknown                | 254 (5%)                 | 220 (8%)                     | 474 (6%)                  |
| Nadir CD4 (cells/mm <sup>3</sup> )                                                                | <50                    | 871 (18%)                | 538 (18%)                    | 1,409 (18%)               |
|                                                                                                   | 50-199                 | 1,595 (33%)              | 797 (27%)                    | 2,392 (31%)               |
|                                                                                                   | 200-349                | 1,295 (27%)              | 746 (25%)                    | 2,041 (26%)               |
|                                                                                                   | 350+                   | 952 (20%)                | 713 (24%)                    | 1,665 (21%)               |
|                                                                                                   | Unknown                | 124 (3%)                 | 138 (5%)                     | 262 (3%)                  |
| History of AIDS-defining event                                                                    |                        | 1,259 (26%)              | 554 (19%)                    | 1,813 (23%)               |
| CD4 count (cells/mm <sup>3</sup> )                                                                | Median (Q1,Q3)         | 616 (445,811)            | 627 (453,849)                | 621 (448,827)             |
| HIV-1 RNA (copies/mL)                                                                             | <LLQ                   | 2,853 (88%)              | 2,397 (87%)                  | 5,250 (88%)               |

|                                         |                       |               |               |               |
|-----------------------------------------|-----------------------|---------------|---------------|---------------|
|                                         | LLQ ≤400              | 310 (10%)     | 307 (11%)     | 617 (10%)     |
|                                         | 400+                  | 69 (2%)       | 61 (2%)       | 130 (2%)      |
| HIV-1 RNA (log <sub>10</sub> copies/mL) | Median (Q1,Q3)        | 1.8 (1.5,2.4) | 1.8 (1.5,2.2) | 1.8 (1.5,2.3) |
| Total ART use (years)                   | Median (Q1,Q3)        | 9 (5,14)      | 10 (6,17)     | 10 (5,15)     |
| ART regimen class                       | NRTI + INSTI          | 1,001 (21%)   | 990 (34%)     | 1,991 (26%)   |
|                                         | NRTI + NNRTI          | 2,708 (56%)   | 961 (33%)     | 3,669 (47%)   |
|                                         | NRTI + PI             | 809 (17%)     | 627 (21%)     | 1,436 (18%)   |
|                                         | NRTI-sparing          | 99 (2%)       | 104 (4%)      | 203 (3%)      |
|                                         | Other NRTI-containing | 220 (5%)      | 250 (9%)      | 470 (6%)      |
| <b>Other Co-morbidities</b>             |                       |               |               |               |
| History of cancer                       |                       | 133 (3%)      | 123 (4%)      | 256 (3%)      |
| History of non-AIDS cancer              |                       | 65 (1%)       | 49 (2%)       | 114 (1%)      |
| History of kidney disease               |                       | 4 (<0.5%)     | 1 (<0.5%)     | 5 (<0.5%)     |
| Chronic active HBV                      |                       | 124 (3%)      | 84 (3%)       | 208 (3%)      |
| Chronic active HCV                      |                       | 80 (2%)       | 74 (3%)       | 154 (2%)      |

(Q1,Q3): interquartile range; BMI: body mass index; LDL-C: low-density lipoprotein cholesterol; HDL-C: high-density lipoprotein cholesterol; ART: antiretroviral therapy; LLQ: lower limit of quantitation; NRTI: nucleoside reverse transcriptase inhibitor; INSTI: integrase strand transfer inhibitor; NNRTI: non-nucleoside reverse transcriptase inhibitor; PI: protease inhibitor; HBV: hepatitis B virus; HCV: hepatitis C virus

**Table S2. Baseline characteristics for all participants, stratified by ASCVD tertiles.**

| <b>Baseline characteristics for all participants, stratified by ASCVD category</b> |                                        |                                                |                                             |                                           |                |
|------------------------------------------------------------------------------------|----------------------------------------|------------------------------------------------|---------------------------------------------|-------------------------------------------|----------------|
| <b>Variable</b>                                                                    | <b>All participants<br/>(N = 4495)</b> | <b>Mean (SD)</b>                               |                                             |                                           | <b>P-value</b> |
|                                                                                    |                                        | <b>ASCVD risk 0% to<br/>&lt; 5% (n = 2644)</b> | <b>ASCVD risk 5% to<br/>7.5% (n = 1040)</b> | <b>ASCVD risk &gt;<br/>7.5% (n = 804)</b> |                |
| Age (years)                                                                        | 49.9 (6.4)                             | 47.3 (5.0)                                     | 52.1 (5.9)                                  | 55.6 (6.1)                                | <0.0001        |
| Body Mass Index (kg/m <sup>2</sup> )                                               | 26.2 (5.9)                             | 26.1 (6.1)                                     | 26.4 (5.6)                                  | 26.1 (5.5)                                | 0.399          |
| Total years smoked                                                                 | 20.2 (12.3)                            | 17.5 (11.5)                                    | 20.7 (11.8)                                 | 24.1 (13.1)                               | <0.0001        |
| CD4 count (cells/mm <sup>3</sup> )                                                 | 654.1 (291.1)                          | 661.4 (292.1)                                  | 650.7 (288.3)                               | 634.5 (291.1)                             | 0.0062         |
| eGFR (mL/min)                                                                      | 99.1 (19.2)                            | 101.5 (18.9)                                   | 96.1 (19.1)                                 | 95.1 (19.3)                               | <0.0001        |
| LDL-C concentration<br>(mg/dL)                                                     | 107.2 (30.8)                           | 106.7 (30.7)                                   | 109.6 (31.7)                                | 105.9 (29.8)                              | 0.79           |
| HDL-C concentration<br>(mg/dL)                                                     | 51.5 (16.9)                            | 52.7 (17.4)                                    | 50.1 (16.0)                                 | 49.2 (16.1)                               | <0.0001        |
| Triglyceride concentration<br>(mg/dL)                                              | 131.6 (82.0)                           | 123.2 (75.3)                                   | 141.6 (84.7)                                | 145.6 (94.9)                              | <0.0001        |
| Glucose concentration<br>(mg/dL)                                                   | 89.6 (14.3)                            | 88.8 (12.9)                                    | 90.2 (11.9)                                 | 91.8 (19.8)                               | <0.0001        |
| <b>Variable</b>                                                                    | <b>All participants</b>                | <b>Participants, No./total No. (%)</b>         |                                             |                                           |                |
|                                                                                    |                                        | <b>ASCVD risk<br/>0% to &lt; 5%</b>            | <b>ASCVD risk<br/>5% to 7.5%</b>            | <b>ASCVD risk<br/>&gt; 7.5%</b>           |                |
| Sex                                                                                |                                        |                                                |                                             |                                           |                |
| Female                                                                             | 1652 / 4488 (36.8%)                    | 1345 / 2644 (50.9%)                            | 196 / 1040 (18.8%)                          | 111 / 804 (13.8%)                         |                |
| Male                                                                               | 2836 / 4488 (63.2%)                    | 1299 / 2644 (49.1%)                            | 844 / 1040 (81.2%)                          | 693 / 804 (86.2%)                         |                |
| Race                                                                               |                                        |                                                |                                             |                                           |                |
| African                                                                            | 2327 / 4495 (51.8%)                    | 1186 / 2644 (44.9%)                            | 609 / 1040 (58.6%)                          | 528 / 804 (65.7%)                         |                |
| European                                                                           | 1118 / 4495 (24.9%)                    | 667 / 2644 (25.2%)                             | 271 / 1040 (26.1%)                          | 177 / 804 (22%)                           |                |
| East Asian                                                                         | 600 / 4495 (13.3%)                     | 471 / 2644 (17.8%)                             | 82 / 1040 (7.9%)                            | 47 / 804 (5.8%)                           |                |
| South Asian                                                                        | 450 / 4495 (10%)                       | 320 / 2644 (12.1%)                             | 78 / 1040 (7.5%)                            | 52 / 804 (6.5%)                           |                |
| Hypertension                                                                       | 1485 / 4495 (33%)                      | 588 / 2644 (22.2%)                             | 423 / 1040 (40.7%)                          | 474 / 804 (59%)                           |                |
| Physical Activity                                                                  |                                        |                                                |                                             |                                           |                |
| Poor                                                                               | 1739 / 4471 (38.9%)                    | 1023 / 2631 (38.9%)                            | 403 / 1038 (38.8%)                          | 313 / 802 (39%)                           |                |
| Intermediate                                                                       | 2211 / 4471 (49.5%)                    | 1298 / 2631 (49.3%)                            | 512 / 1038 (49.3%)                          | 401 / 802 (50%)                           |                |
| Ideal                                                                              | 521 / 4471 (11.7%)                     | 310 / 2631 (11.8%)                             | 123 / 1038 (11.8%)                          | 88 / 802 (11%)                            |                |
| Diet                                                                               |                                        |                                                |                                             |                                           |                |
| Poor                                                                               | 1292 / 4479 (28.8%)                    | 737 / 2636 (28%)                               | 311 / 1040 (29.9%)                          | 244 / 803 (30.4%)                         |                |
| Intermediate                                                                       | 2388 / 4479 (53.3%)                    | 1381 / 2636 (52.4%)                            | 564 / 1040 (54.2%)                          | 443 / 803 (55.2%)                         |                |
| Ideal                                                                              | 799 / 4479 (17.8%)                     | 518 / 2636 (19.7%)                             | 165 / 1040 (15.9%)                          | 116 / 803 (14.4%)                         |                |

Table of baseline characteristics for all 4495 participants, including stratification into ASCVD tertiles (0% to <5%, 5% to 7.5%, and >7.5%). The top section of baseline characteristics (rows 'Age' to 'Triglyceride concentration') lists the mean (SD) value, in addition to stratification by ASCVD tertiles. P-value corresponds to Students' t-test between <5% and >7.5% ASCVD risk cohorts. The bottom section (rows 'Sex' to 'Diet') counts the number of participants in each variable subcategory among all participants, in addition to stratification by ASCVD tertiles. eGFR: estimated glomerular filtration rate; LDL-C: low-density lipoprotein cholesterol; HDL-C: high-density lipoprotein cholesterol

**Table S3. Relationships between CAD PRS and subclinical CAD phenotypes.**

| Variable                                                          | Without phenotype |               | With phenotype |               | P-value    |
|-------------------------------------------------------------------|-------------------|---------------|----------------|---------------|------------|
|                                                                   | Mean              | 95% CI        | Mean           | 95% CI        |            |
| Stenosis Over 50%                                                 | 48.2              | [45.9 - 50.5] | 66.1           | [55.6 - 76.5] | p = 0.0033 |
| Plaque with Vulnerable Features                                   | 47.2              | [44.6 - 49.7] | 55.2           | [50.7 - 59.8] | p = 0.0027 |
| Partially Calcified Plaque                                        | 46.1              | [43.4 - 48.9] | 54.5           | [50.7 - 58.2] | p = 0.0005 |
| Noncalcified Plaque                                               | 48.1              | [45.7 - 50.4] | 56.8           | [49.8 - 63.7] | p = 0.0166 |
| Visible Noncalcified Plaque Segments                              | 45.5              | [42.6 - 48.3] | 54.2           | [50.8 - 57.7] | p = 0.0001 |
| Visible Noncalcified Plaque or Plaque<br>with Vulnerable Features | 45.2              | [42.3 - 48.1] | 54.2           | [50.8 - 57.6] | p = 0.0001 |
| Plaque Present                                                    | 45.0              | [41.9 - 48.0] | 53.2           | [50.0 - 56.4] | p = 0.0003 |

Table showing the mean CAD PRS and 95% confidence intervals (CI) for participants with or without each CAD phenotype listed in each row, among the 662 participants with CCTA measurements. P-values were derived from Students' t-test between participants with or without each CAD phenotype. 95% CI: 95% confidence interval

**Table S4. Comparison of logistic regression model using original versus spline representation of  $GPS_{Mult}$ .**

| <b>CCTA phenotype</b>                                   | <b>AIC</b>      |               | <b>RMSE</b>     |               |
|---------------------------------------------------------|-----------------|---------------|-----------------|---------------|
|                                                         | <b>Original</b> | <b>Spline</b> | <b>Original</b> | <b>Spline</b> |
| Stenosis Over 50%                                       | 200.97          | 198.79        | 0.1823          | 0.1813        |
| Plaque with Vulnerable Features                         | 695.14          | 689.52        | 0.4072          | 0.4073        |
| Partially Calcified Plaque                              | 805.72          | 806.86        | 0.4500          | 0.4493        |
| Noncalcified Plaque                                     | 465.17          | 457.97        | 0.3076          | 0.3106        |
| Visible Noncalcified Plaque Segments                    | 840.95          | 836.41        | 0.4628          | 0.4638        |
| Visible Noncalcified Plaque or with Vulnerable Features | 852.40          | 850.77        | 0.4669          | 0.4688        |
| Plaque Present                                          | 837.82          | 834.09        | 0.4615          | 0.4617        |

Table showing two measures of logistic regression model performance (Akaike Information Criterion and Root Mean Square Error) for the ‘Original’ model with outcome of subclinical CCTA measurements and covariates of  $GPS_{Mult}$ , age, sex, and top 10 principal components from genotype, compared to a similar ‘Spline’ model with  $GPS_{Mult}$  and age modeled with natural cubic splines. AIC: Akaike Information Criterion; RMSE: Root Mean Square Error.

**Table S5. Linear Regression coefficients for estimate of subclinical CAD.**

| <b>Linear Regression coefficients for polygenic risk score</b> |                 |                   |                |                    |
|----------------------------------------------------------------|-----------------|-------------------|----------------|--------------------|
| <b>Outcome variable</b>                                        | <b>Estimate</b> | <b>Std. Error</b> | <b>t value</b> | <b>Pr(&gt; t )</b> |
| Leaman score                                                   | 0.402           | 0.104             | 3.877          | 0.00012            |
| Natural log of Coronary Artery Calcium (CAC) score             | 0.308           | 0.074             | 4.138          | 0.00004            |

Table showing Beta coefficients from linear regression (Estimate) to predict each outcome variable (rows) using  $GPS_{Mult}$ . Std. Error: Standard Error of each estimate; Pr(>|t|): P-value associated with the t value in regression.

**Table S6. Linear Regression coefficients for estimate of cardiometabolic traits.**

| <b>Linear Regression coefficients for polygenic risk score</b> |                 |                   |                |                    |
|----------------------------------------------------------------|-----------------|-------------------|----------------|--------------------|
| <b>Outcome variable</b>                                        | <b>Estimate</b> | <b>Std. Error</b> | <b>t value</b> | <b>Pr(&gt; t )</b> |
| LDL cholesterol (mg/dL)                                        | 8.857           | 0.439             | 20.197         | 1.04E-86           |
| Oxidized LDL cholesterol (mg/dL)                               | 2.971           | 0.788             | 3.772          | 1.76E-04           |
| Total cholesterol (mg/dL)                                      | 9.226           | 0.517             | 17.855         | 7.76E-69           |
| Triglycerides (mg/dL)                                          | 14.772          | 1.166             | 12.665         | 4.06E-36           |
| HDL cholesterol (mg/dL)                                        | 4.523           | 0.235             | 19.246         | 3.06E-79           |
| Systolic blood pressure (mmHg)                                 | 2.057           | 0.211             | 9.730          | 3.70E-22           |
| Diastolic blood pressure (mmHg)                                | 1.257           | 0.144             | 8.755          | 2.84E-18           |

Beta coefficients from linear regression (Estimate) to predict each outcome variable (rows) using the respective PRS. LDL cholesterol: low-density lipoprotein cholesterol; HDL cholesterol: high-density lipoprotein cholesterol; Std. Error: Standard Error of each estimate; Pr(>|t|): P-value associated with the t value in regression.



**Table S7. Associations between different cardiometabolic PRS and subclinical CAD.**

**Cardiometabolic PRS association with CAD phenotypes**

| CAD Phenotype                                                  | Cardiometabolic PRS |               |       |         |                   |         |               |         |             |               |              |         |
|----------------------------------------------------------------|---------------------|---------------|-------|---------|-------------------|---------|---------------|---------|-------------|---------------|--------------|---------|
|                                                                | LDL-C               |               | HDL-C |         | Total Cholesterol |         | Triglycerides |         | Systolic BP |               | Diastolic BP |         |
|                                                                | OR                  | P-value       | OR    | P-value | OR                | P-value | OR            | P-value | OR          | P-value       | OR           | P-value |
| Plaque Present                                                 | <b>1.21</b>         | <b>0.0393</b> | 0.96  | 0.6245  | 1.14              | 0.1448  | 1.00          | 0.9500  | 1.06        | 0.4903        | 1.01         | 0.9410  |
| Stenosis Over 50%                                              | 1.31                | 0.2275        | 1.28  | 0.2075  | 1.35              | 0.1732  | 1.04          | 0.8221  | 1.20        | 0.3949        | 1.01         | 0.9485  |
| Plaque with Vulnerable Features                                | 1.07                | 0.5134        | 1.02  | 0.8412  | 1.05              | 0.6013  | 1.05          | 0.5746  | 1.05        | 0.5713        | 0.92         | 0.3575  |
| Partially Calcified Plaque                                     | <b>1.21</b>         | <b>0.0408</b> | 1.04  | 0.6268  | 1.18              | 0.0705  | 0.93          | 0.3587  | 1.02        | 0.8268        | 1.02         | 0.7993  |
| Noncalcified Plaque Only                                       | 1.04                | 0.7617        | 0.86  | 0.2024  | 1.00              | 0.9714  | 1.20          | 0.1223  | <b>1.33</b> | <b>0.0218</b> | 1.10         | 0.4379  |
| Visible Noncalcified Plaque Segments                           | 1.17                | 0.0852        | 0.95  | 0.4964  | 1.13              | 0.1491  | 1.02          | 0.8198  | 1.04        | 0.6285        | 0.97         | 0.6819  |
| Visible Noncalcified Plaque or Plaque with Vulnerable Features | 1.17                | 0.0730        | 0.96  | 0.6140  | 1.13              | 0.1606  | 1.02          | 0.7515  | 1.06        | 0.4410        | 0.98         | 0.8439  |

Table of the odds ratios (OR) and associated p-values for the associations between different cardiometabolic PRS (LDL-C, HDL-C, Total Cholesterol, Triglycerides, Systolic and Diastolic blood pressures) and measures of subclinical CAD phenotypes. Statistically significant associations ( $p < 0.05$ ) are highlighted with red text. LDL-C: low-density lipoprotein cholesterol; HDL-C: high-density lipoprotein cholesterol; BP: blood pressure; OR: odds ratio.

**Figure S1. Consort Diagram and LDL-C/ASCVD inclusion criteria.**

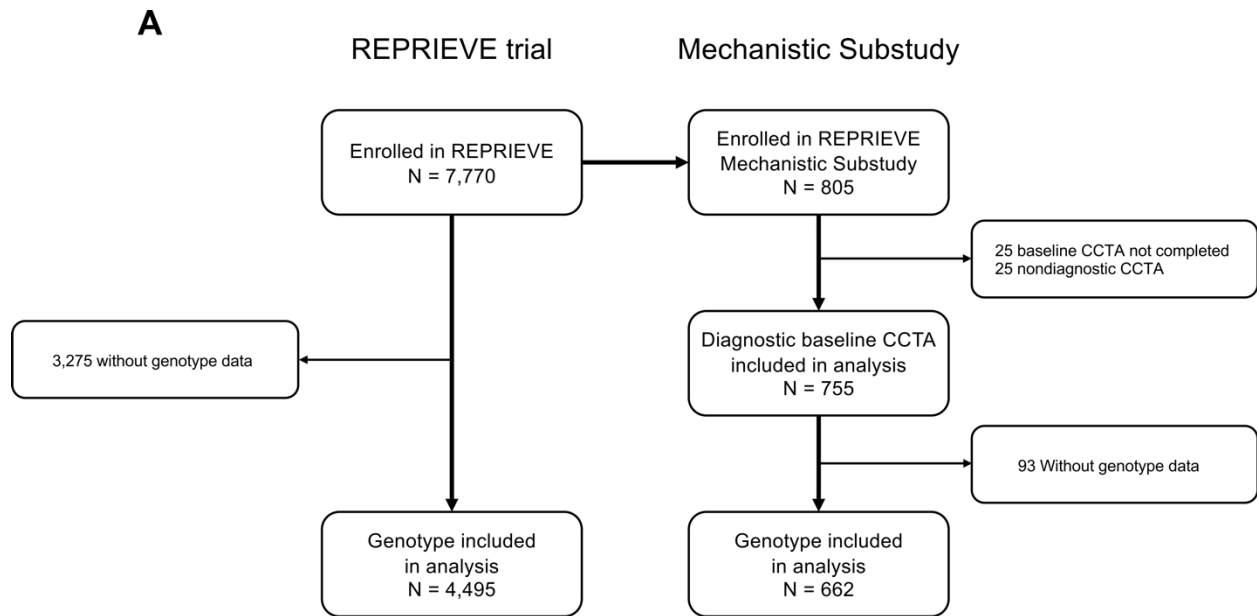

- B** **Inclusion criteria based on LDL-C thresholds and 10-year ASCVD risk score**  
 If ASCVD risk score <7.5%, then LDL-C must be less than 190 mg/dL.  
 If ASCVD risk score ≥7.5% and ≤10%, then LDL-C must be less than 160 mg/dL.  
 If ASCVD risk score >10% and ≤15%, then LDL-C must be less than 130 mg/dL.  
 If LDL-C is less than 70 mg/dL, the participant is eligible regardless of ASCVD risk score.

**A)** Consort diagram that led to the 4495 total genotyped participants in this study, including 662 with CCTA.

**B)** Inclusion criteria for the REPRIEVE trial based on LDL-C thresholds and 10-year ASCVD risk scores.

CCTA: coronary computed tomography angiography; LDL-C: low-density lipoprotein cholesterol; ASCVD: atherosclerotic cardiovascular disease

**Figure S2. Relationships between CAD PRS and subclinical CAD phenotypes.**

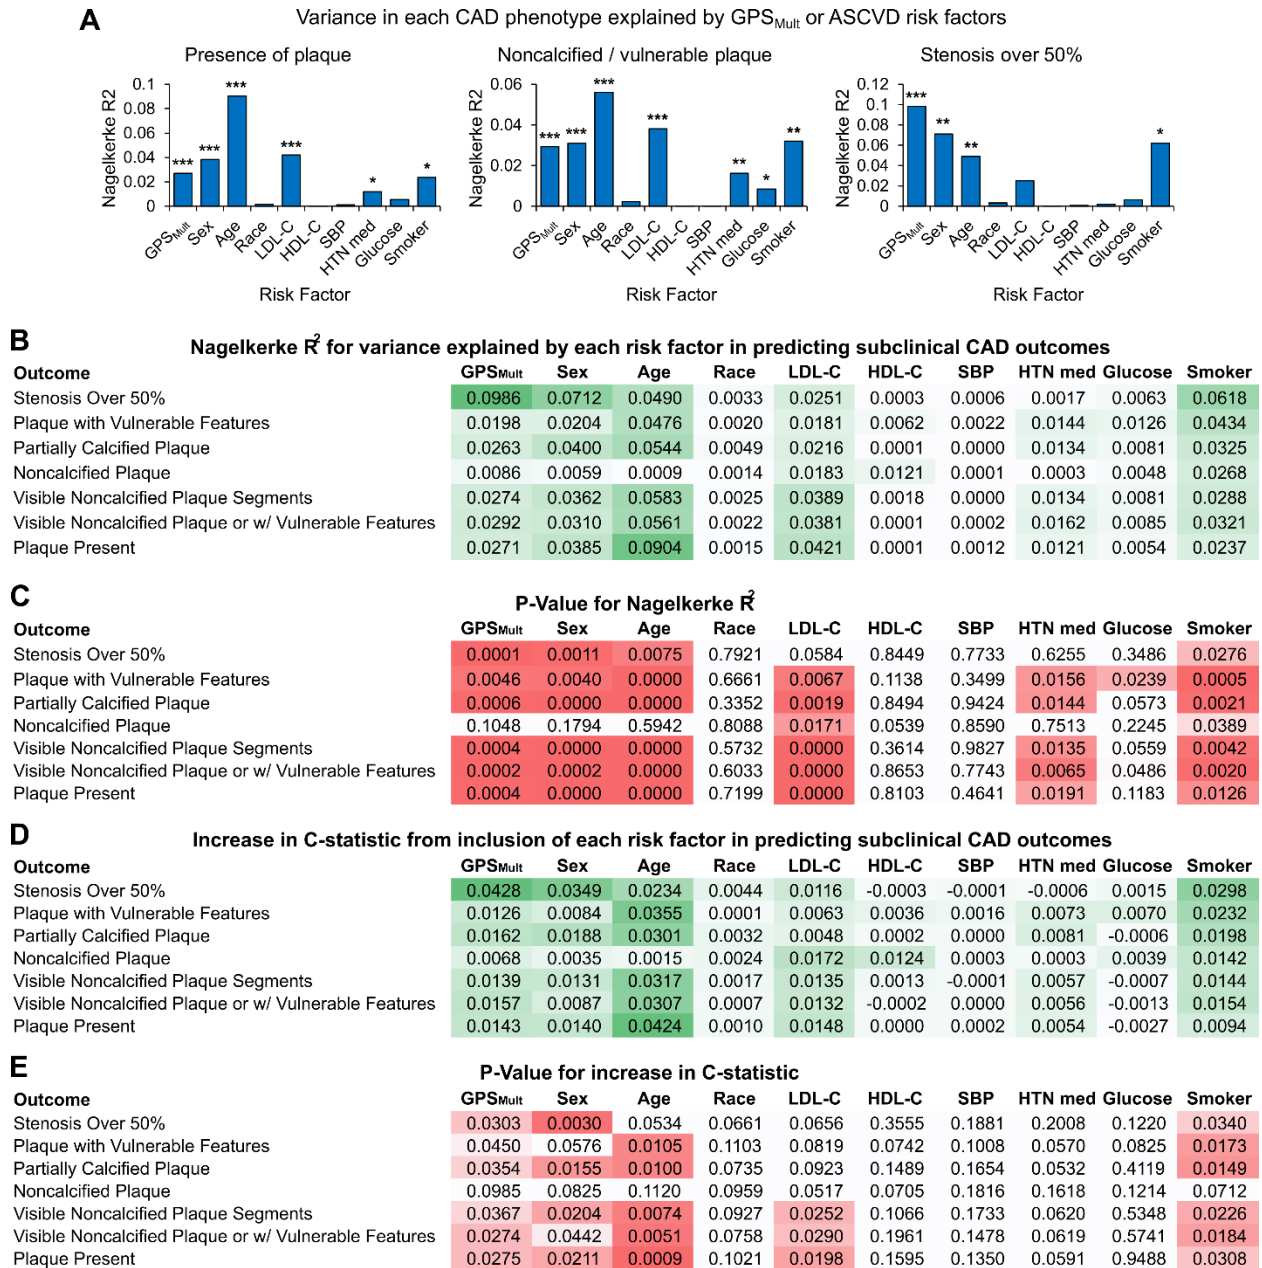

**A)** Plots of Nagelkerke  $R^2$  (y-axis) for each CAD risk factor (x-axis), for predicting three different subclinical CAD. No asterisk is  $p \geq 0.05$ , \* is  $p < 0.05$ , \*\* is  $p < 0.01$ , and \*\*\* is  $p < 0.001$ . Figure S2B-C lists the corresponding plot values and p-values, respectively.

**B-C)** Table showing B) Nagelkerke  $R^2$  and C) associated p-values, for the relative contributions of each CAD risk factor (columns) to predict subclinical CAD (rows). Green and red conditional formatting correlates to  $R^2$  strength and strength of significance ( $p < 0.05$ ), respectively.

**D-E)** Table showing the D) increase in C-statistic from inclusion of each ASCVD risk factor and E) associated p-values. Green and red conditional formatting correlates to strength of C-statistic increase and strength of significance ( $p < 0.05$ ), respectively.

LDL-C: low-density lipoprotein cholesterol; HDL-C: high-density lipoprotein cholesterol; SBP: systolic blood pressure; HTN med: use of anti-hypertensive medication

**Figure S3. Statistical analyses of cardiometabolic PRS and subclinical CAD phenotypes.**

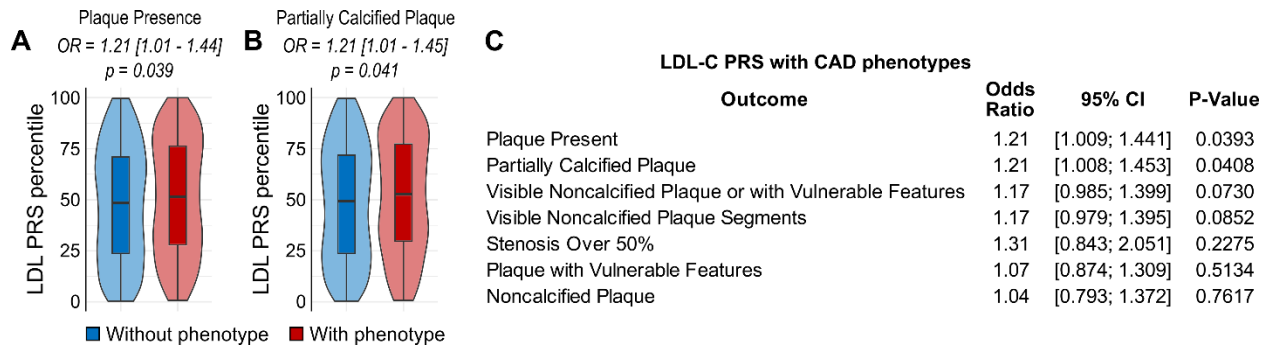

**A-B)** Violin plots with box and whiskers summarizing the LDL-C PRS percentiles (y-axis) for participants with or without evidence of A) any plaque and B) partially calcified plaque. The whiskers represent max and min, box span from first to third quartiles, middle line represents median.

**C)** Table of OR for the association between LDL-C PRS and different measures of subclinical CAD among participants with CCTA measurements. Table includes 95% confidence intervals (CI) and p-value of the OR.

95% CI: 95% confidence interval

**Figure S4. Efficacy of genome-wide PRS for lipid traits and blood pressures.**

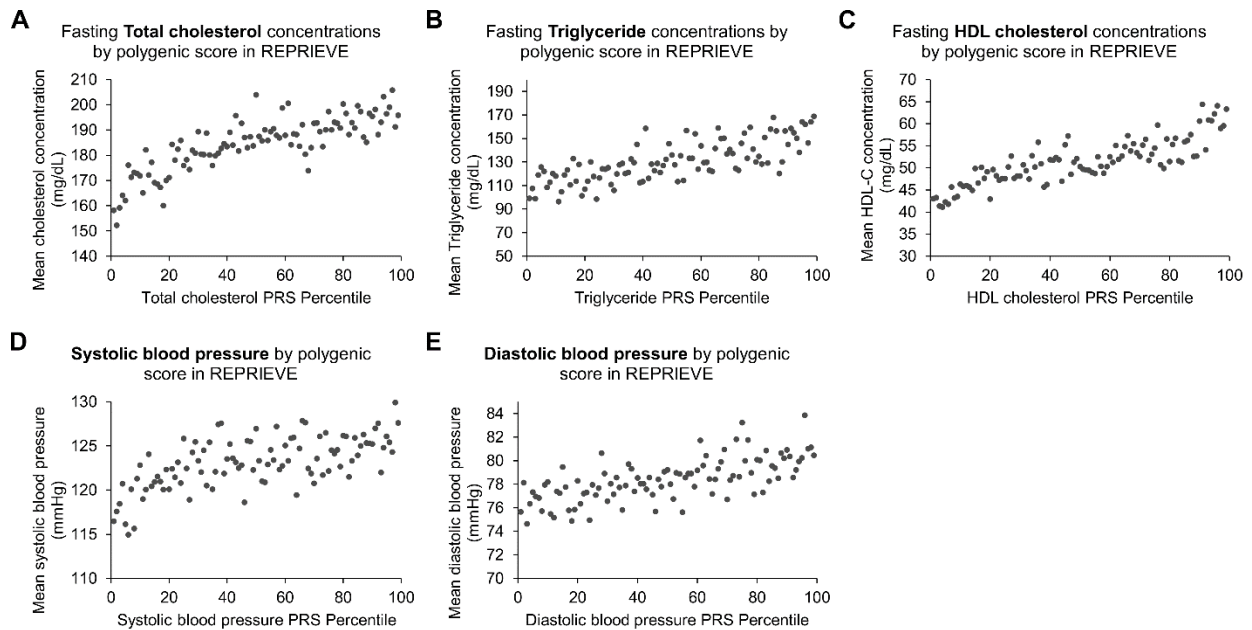

**A)** Plot of the mean baseline total cholesterol concentration (mg/dL) (y-axis), among participants in each total cholesterol PRS percentile (x-axis).

**B)** Plot of the mean baseline triglyceride concentration (mg/dL), among participants in each triglyceride PRS percentile (x-axis).

**C)** Plot of the mean baseline high density lipoprotein cholesterol (HDL-C) concentration (mg/dL), among participants in each HDL-C PRS percentile (x-axis).

**D)** Plot of the mean baseline systolic blood pressure (mmHg), among participants in each PRS percentile (x-axis).

**E)** Plot of the mean baseline diastolic blood pressure (mmHg), among participants in each PRS percentile (x-axis).

HDL: high-density lipoprotein
